# Supplementary material for: Co-selection may explain the unexpectedly high prevalence of plasmid-mediated colistin resistance gene mcr-1 in a Chinese broiler farm
Source: PubMed Central journal article supplement — Zool Res. 2020 Sep 18;41(5):569–75. doi: 10.24272/j.issn.2095-8137.2020.131 (PMC7475015; doi:10.24272/j.issn.2095-8137.2020.131), 2020-09-18
Supplement: zr-41-5-569-S1.pdf [file zr-41-5-569-S1.pdf]

## Supplementary Materials

A

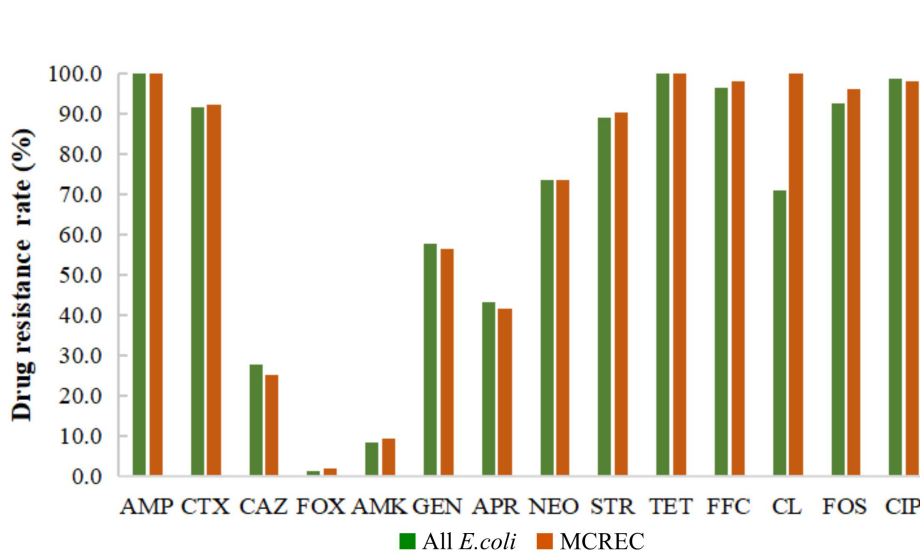

B

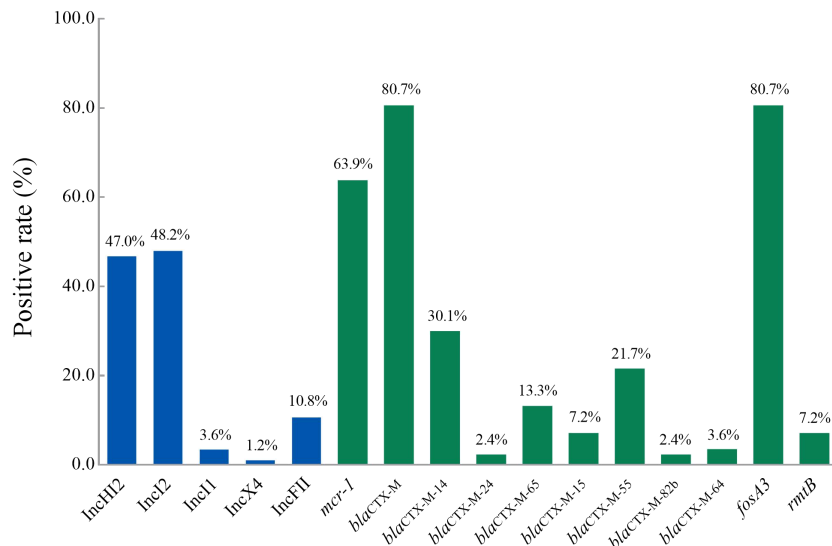

Supplementary Figure S1 Antibiotic resistance phenotypes and genotypes of recovered *E. coli*

A: Antibiotic resistance profile of all 83 *E. coli* and 53 *mcr-1*-positive *E. coli* (MCREC) (AMP, ampicillin; CTX, cefotaxime; CAZ, ceftazidime; FOX, ceftaxime; AMK, amikacin; GEN, gentamicin; APR, apramycin; NEO, neomycin; STR, streptomycin; TET, tetracycline; FFC, florfenicol; CL, colistin; FOS, fosfomycin; CIP, ciprofloxacin).

B: Detection of antibiotic resistance genes and plasmids in all 83 *E. coli* isolates.

**Supplementary Table S1 Primers used for PCR in this study**

| Gene                           | Primer name                      | Sequence (5'-3')          | Size (bp) | References             |
|--------------------------------|----------------------------------|---------------------------|-----------|------------------------|
| <i>mcr-1</i>                   | <i>mcr-1</i> -F                  | CGGTCAGTCCGTTTGTTC        | 309       | Liu et al., 2016       |
|                                | <i>mcr-1</i> -R                  | CTTGGTCGGTCTGTAGGG        |           |                        |
| <i>bla</i> <sub>CTX-M-1G</sub> | <i>bla</i> <sub>CTX-M-1</sub> -F | CTTCCAGAATAAGGAATCCC      | 949       | Pitout et al., 2004    |
|                                | <i>bla</i> <sub>CTX-M-1</sub> -R | CGTCTAAGGCGATAAACAAA      |           |                        |
| <i>bla</i> <sub>CTX-M-9G</sub> | <i>bla</i> <sub>CTX-M-9</sub> -F | TGACCGTATTGGGAGTTTG       | 902       | Costa et al., 2006     |
|                                | <i>bla</i> <sub>CTX-M-9</sub> -R | ATGATGACTCAGAGCATTTCG     |           |                        |
| <i>fosA3</i>                   | FosA3-F                          | GCGTCAAGCCTGGCATT         | 282       | Hou et al., 2012       |
|                                | FosA3-R                          | GCCGTCAGGGTCGAGAAA        |           |                        |
| <i>rmtB</i>                    | rmtB-F                           | ATATCAACGATGCCCTCAC       | 725       | Li et al., 2015        |
|                                | rmtB-R                           | AAGTTCTGTTCCGATGGTC       |           |                        |
| <i>floR</i>                    | floR-F                           | CTGAGGGTGTGTCATCT AC      | 673       | Chen et al., 2004      |
|                                | floR-R                           | GCTCCGACAATGCTGACT AT     |           |                        |
| IncHI2                         | IncHI2-F                         | TTTCTCCTGAGTCACCTGTAAACAC | 644       | Carattoli et al., 2005 |
|                                | IncHI2-R                         | GGCTCACTACCGTTGTCATCCT    |           |                        |
| IncI2                          | IncI2-F                          | CTGTCGGCATGTCTGTCTC       | 553       | Lv et al., 2013        |
|                                | IncI2-R                          | CTGGCTACCAGTTGCTCTAA      |           |                        |
| IncI1                          | IncI1-F                          | CGAAAGCCGGACGGCAGAA       | 139       | Carattoli et al., 2005 |
|                                | IncI1-R                          | TCGTTCGTTCCGCCAAGTTCGT    |           |                        |
| IncX4                          | IncX4-F                          | AGCAAACAGGGAAAGGAGAAGACT  | 569       | Johnson et al., 2012   |
|                                | IncX4-R                          | TACCCCAAATCGTAACCTG       |           |                        |
| IncFII                         | FrepB-F                          | TGATCGTTTAAGGAATTTTG      | 270       | Carattoli et al., 2005 |
|                                | FrepB-R                          | GAAGATCAGTCACACCATCC      |           |                        |

**Supplementary Table S2 Primers used for determining genetic environment of *mcr-1***

| Region              | Primer name | Sequence (5'-3')        | Size (bp) | References         |
|---------------------|-------------|-------------------------|-----------|--------------------|
| <i>ISAp11-mcr-1</i> | ISAp-F      | CGAAGCACCAAGACATCA      | 393       | Yi et al.,<br>2017 |
|                     | MCR-R       | TTTCTCGCTCGTTTATTGTA    |           |                    |
| <i>mcr-1-ISAp11</i> | Mhp-F       | TTGCCAGATTTGCTACTGT     | 696       | Wu et al.,<br>2018 |
|                     | ISAp-R      | TTTCTCGCTCGTTTATTGTA    |           |                    |
| <i>IncI2-mcr-1</i>  | IncI2-F     | AGTGGATGTTACGGAGCAG     | 894       | Wu et al.,<br>2018 |
|                     | mprA-R      | CCACAAGAACAAACGGACT     |           |                    |
| <i>mcr-1-IncI2</i>  | clrAD-F     | GTATCTGGTGCTGACTTTGA    | 723       | Wu et al.,<br>2018 |
|                     | IncI2-R     | ACTTAGCGATCTCGTTGTT     |           |                    |
| <i>IncX4-mcr-1</i>  | IncX4-F3    | AGAGCTTGAGGGAATAGAA     | 879       | Wu et al.,<br>2018 |
|                     | mcr-R3      | CACAGGCTTTAGCACATAG     |           |                    |
| <i>mcr-1-IncX4</i>  | mcr-F5      | AACGGTGTCTATCTACATGGTAT | 1674      | Wu et al.,<br>2018 |
|                     | IncX4-R5    | CATTGAATTTGTTTCGTCCTC   |           |                    |
| <i>IncHI2-mcr-1</i> | HI2-M-F     | TGGGGTAATGAGCATGAAACA   | 1558      | This study         |
|                     | HI2-M-R     | CACAAAGCCGAGATTGTCC     |           |                    |
| <i>mcr-1-IncHI2</i> | M-HI2-F     | GATGATCGCACCACGACGG     | 1215      | This study         |
|                     | M-HI2-R     | CCGGAGGCAAAATTCCCGTT    |           |                    |

## REFERENCES

Carattoli A, Bertini A, Villa L, Falbo V, Hopkins KL, Threlfall EJ. 2005. Identification of plasmids by PCR-based replicon typing. *Journal of Microbiological Methods*, **63**(3): 219–228.

Chen S, Zhao SH, White DG, Schroeder CM, Lu R, Yang HC, McDermott PF, Ayers S, Meng JH. 2004. Characterization of multiple-antimicrobial-resistant *Salmonella* serovars isolated from retail meats. *Applied and Environmental Microbiology*, **70**(1): 1–7.

Costa D, Poeta P, Sáenz Y, Vinué L, Rojo-Bezares B, Jouini A, Zarazaga M, Rodrigues J, Torres C. 2006. Detection of *Escherichia coli* harbouring

extended-spectrum  $\beta$ -lactamases of the CTX-M, TEM and SHV classes in faecal samples of wild animals in Portugal. *Journal of Antimicrobial Chemotherapy*, **58**(6): 1311–1312.

Hou JX, Huang XH, Deng YT, He LY, Yang T, Zeng ZL, Chen ZL, Liu JH. 2012. Dissemination of the fosfomycin resistance gene *fosA3* with CTX-M  $\beta$ -lactamase genes and *rmtB* carried on IncFII plasmids among *Escherichia coli* isolates from pets in China. *Antimicrobial Agents and Chemotherapy*, **56**(4): 2135–2138.

Johnson TJ, Bielak EM, Fortini D, Hansen LH, Hasman H, Debroy C, Nolan LK, Carattoli A. 2012. Expansion of the IncX plasmid family for improved identification and typing of novel plasmids in drug-resistant *Enterobacteriaceae*. *Plasmid*, **68**(1): 43–50.

Li BB, Zhang Y, Wei JC, Shao DH, Liu K, Shi YY, Qiu YF, Ma ZY. 2015. Characterization of a novel small plasmid carrying the florfenicol resistance gene *floR* in *Haemophilus parasuis*. *Journal of Antimicrobial Chemotherapy*, **70**(11): 3159–3161.

Liu YY, Wang Y, Walsh TR, Yi LX, Zhang R, Spencer J, Doi Y, Tian GB, Dong BL, Huang XH, Yu LF, Gu DX, Ren HW, Chen XJ, Lv LC, He DD, Zhou HW, Liang ZS, Liu JH, Shen JZ. 2016. Emergence of plasmid-mediated colistin resistance mechanism MCR-1 in animals and human beings in China: a microbiological and molecular biological study. *The Lancet Infectious Diseases*, **16**(2): 161–168.

Lv LC, Partridge SR, He LY, Zeng ZL, He DD, Ye JH, Liu JH. 2013. Genetic characterization of IncI2 plasmids carrying *bla*<sub>CTX-M-55</sub> spreading in both pets and food animals in China. *Antimicrobial Agents and Chemotherapy*, **57**(6): 2824–2827.

Pitout JDD, Hossain A, Hanson ND. 2004. Phenotypic and molecular detection of CTX-M- $\beta$ -lactamases produced by *Escherichia coli* and *Klebsiella* spp. *Journal of Clinical Microbiology*, **42**(12): 5715–5721.

Wu RJ, Yi LX, Yu LF, Wang J, Liu YY, Chen XJ, Lv LC, Yang J, Liu JH. 2018. Fitness advantage of *mcr-1*-bearing IncI2 and IncX4 plasmids *in vitro*. *Frontiers in Microbiology*, **9**: 331.

Yi LX, Wang J, Gao YL, Liu YY, Doi Y, Wu RJ, Zeng ZL, Liang ZS, Liu JH. 2017. *mcr-1*-harboring *Salmonella enterica* serovar typhimurium sequence type 34 in pigs, China. *Emerging Infectious Diseases*, **23**(2): 291–295.
